# Supplementary material for: Involvement of signal peptidase I in Streptococcus sanguinis biofilm formation
Source: PubMed Central journal article supplement (PMC5817204; doi:10.1099/mic.0.000516), 2017-09-04
Supplement: mic-163-1306-s001.pdf [file mic-163-1306-s001.pdf]

**S1 table.** Description of potential SPase substrates as predicted by LipoP software.

| Gene symbol     | Gene description                                                                                        |
|-----------------|---------------------------------------------------------------------------------------------------------|
| <i>SSA_0012</i> | Beta-lactamase class A, putative                                                                        |
| <i>SSA_0015</i> | Membrane ATPase FtsH, degrades sigma32 (integral membrane cell-division Zn metallo-peptidase), putative |
| <i>SSA_0017</i> | Cell shape determining protein MreC, putative                                                           |
| <i>SSA_0019</i> | Secreted antigen GbpB/SagA; peptidoglycan hydrolase; PcsB protein precursor, putative                   |
| <i>SSA_0021</i> | hypothetical protein SSA_0021                                                                           |
| <i>SSA_0036</i> | Secreted protein, possible function in cell-wall metabolism (amidase), putative                         |
| <i>SSA_0094</i> | Cell wall metabolism, LysM type protein, putative                                                       |
| <i>SSA_0140</i> | Copper-translocating P-type ATPase, putative                                                            |
| <i>SSA_0146</i> | DNA repair ATPase, putative                                                                             |
| <i>SSA_0157</i> | hypothetical protein SSA_0157                                                                           |
| <i>SSA_0165</i> | hypothetical protein SSA_0165                                                                           |
| <i>SSA_0167</i> | Hypothetical protein (Asparagine/proline-rich)                                                          |
| <i>SSA_0173</i> | 23S rRNA m1G745 methyltransferase, putative                                                             |
| <i>SSA_0175</i> | Penicillin-binding protein 1B, putative                                                                 |
| <i>SSA_0181</i> | Glycosyltransferase (vectorial glycosyl polymerization (VGP) family), putative                          |
| <i>SSA_0186</i> | Competence protein ComYC, putative                                                                      |
| <i>SSA_0187</i> | Competence protein ComYD, putative                                                                      |
| <i>SSA_0189</i> | Competence protein ComGF, putative                                                                      |
| <i>SSA_0210</i> | hypothetical protein SSA_0210                                                                           |
| <i>SSA_0215</i> | Periplasmic sugar-binding protein (ribose porter), putative                                             |
| <i>SSA_0218</i> | Sugar-binding periplasmic protein, putative                                                             |
| <i>SSA_0227</i> | Collagen-binding surface protein, putative                                                              |
| <i>SSA_0243</i> | 2',3'-cyclic nucleotide 2'-phosphodiesterase/3'-nucleotidase bifunctional periplasmic precursor protein |
| <i>SSA_0257</i> | N-acetylmuramidase/lysin, putative                                                                      |
| <i>SSA_0273</i> | hypothetical protein SSA_0273                                                                           |
| <i>SSA_0291</i> | short chain dehydrogenase                                                                               |

|                 |                                                                                         |
|-----------------|-----------------------------------------------------------------------------------------|
| <i>SSA_0301</i> | hypothetical protein SSA_0301                                                           |
| <i>SSA_0303</i> | surface protein C                                                                       |
| <i>SSA_0304</i> | Bacterial cell wall degradation (CHAP/LysM domains), putative                           |
| <i>SSA_0351</i> | Signal peptidase I, putative                                                            |
| <i>SSA_0396</i> | hypothetical protein SSA_0396                                                           |
| <i>SSA_0398</i> | hypothetical protein SSA_0398                                                           |
| <i>SSA_0400</i> | hypothetical protein SSA_0400                                                           |
| <i>SSA_0424</i> | Exopolysaccharide biosynthesis protein, putative                                        |
| <i>SSA_0453</i> | Type II secretory pathway, pullulanase PulaA glycosidase, putative                      |
| <i>SSA_0477</i> | Cobalamin biosynthesis protein CbiM (ABC-type cobalt transporter), putative             |
| <i>SSA_0478</i> | Cobalt transport protein cbiN, putative                                                 |
| <i>SSA_0498</i> | ABC-type dipeptide/oligopeptide/nickel transport systems, permease components, putative |
| <i>SSA_0500</i> | Peptide ABC transporter, permease protein, putative                                     |
| <i>SSA_0521</i> | Ethanolamine utilization protein EutL, putative                                         |
| <i>SSA_0565</i> | hypothetical protein SSA_0565                                                           |
| <i>SSA_0607</i> | ABC transporter, permease component, putative                                           |
| <i>SSA_0610</i> | LemA-like protein, putative                                                             |
| <i>SSA_0613</i> | Glucosyltransferase, putative                                                           |
| <i>SSA_0684</i> | Fibril-like structure subunit FibA, putative                                            |
| <i>SSA_0689</i> | Penicillin-binding protein 2B, putative                                                 |
| <i>SSA_0723</i> | hypothetical protein SSA_0723                                                           |
| <i>SSA_0726</i> | FmtA-like protein, putative                                                             |
| <i>SSA_0747</i> | DD-carboxypeptidase, putative                                                           |
| <i>SSA_0793</i> | DNA-entry nuclease, putative                                                            |
| <i>SSA_0801</i> | Mur ligase family protein, putative                                                     |
| <i>SSA_0803</i> | hypothetical protein SSA_0803                                                           |
| <i>SSA_0805</i> | Collagen-binding surface protein, putative                                              |
| <i>SSA_0871</i> | Cell division protein FtsX, putative                                                    |
| <i>SSA_0881</i> | Lipoprotein, putative                                                                   |
| <i>SSA_0897</i> | Two component system histidine kinase, putative                                         |
| <i>SSA_0904</i> | CshA-like fibrillar surface protein A                                                   |

|                 |                                                                                              |
|-----------------|----------------------------------------------------------------------------------------------|
| <i>SSA_0905</i> | CshA-like fibrillar surface protein B                                                        |
| <i>SSA_0906</i> | CshA-like fibrillar surface protein C                                                        |
| <i>SSA_0908</i> | ABC-type uncharacterized transport system,<br>periplasmic component, putative                |
| <i>SSA_0947</i> | hypothetical protein <i>SSA_0947</i>                                                         |
| <i>SSA_0956</i> | surface protein D                                                                            |
| <i>SSA_0963</i> | Peptidoglycan N-acetylglucosamine<br>deacetylase A, putative                                 |
| <i>SSA_0967</i> | hypothetical protein <i>SSA_0967</i>                                                         |
| <i>SSA_0970</i> | hypothetical protein <i>SSA_0970</i>                                                         |
| <i>SSA_0991</i> | Deoxyribonuclease, putative                                                                  |
| <i>SSA_1018</i> | Zinc metalloprotease <i>zmpC</i> precursor,<br>putative                                      |
| <i>SSA_1019</i> | Collagen-binding surface protein, putative                                                   |
| <i>SSA_1023</i> | Von Willebrand factor-binding protein<br>precursor, putative                                 |
| <i>SSA_1042</i> | Xylanase/chitin deacetylase, putative                                                        |
| <i>SSA_1051</i> | Spermidine/putrescine ABC transporter,<br>spermidine/putrescine-binding protein,<br>putative |
| <i>SSA_1052</i> | hypothetical protein <i>SSA_1052</i>                                                         |
| <i>SSA_1063</i> | Peptidoglycan-binding domain-containing<br>protein, putative                                 |
| <i>SSA_1064</i> | hypothetical protein <i>SSA_1064</i>                                                         |
| <i>SSA_1065</i> | Beta-hexosamidase A, putative                                                                |
| <i>SSA_1095</i> | Peptidoglycan hydrolase, putative                                                            |
| <i>SSA_1106</i> | IgA-specific metalloendopeptidase                                                            |
| <i>SSA_1112</i> | Cell wall surface anchor family protein,<br>putative                                         |
| <i>SSA_1118</i> | Peptide methionine sulfoxide reductase,<br>putative                                          |
| <i>SSA_1130</i> | Iron-dependent peroxidase, putative                                                          |
| <i>SSA_1132</i> | TatC, sec-independent protein translocase,<br>putative                                       |
| <i>SSA_1148</i> | Beta-glucosides PTS, EIIC, putative                                                          |
| <i>SSA_1158</i> | hypothetical protein <i>SSA_1158</i>                                                         |
| <i>SSA_1161</i> | hypothetical protein <i>SSA_1161</i>                                                         |
| <i>SSA_1219</i> | Sortase, putative                                                                            |
| <i>SSA_1221</i> | L-lactate dehydrogenase                                                                      |
| <i>SSA_1234</i> | 5'-nucleotidase, putative                                                                    |
| <i>SSA_1274</i> | hypothetical protein <i>SSA_1274</i>                                                         |
| <i>SSA_1301</i> | Conserved uncharacterized protein, possible<br>surface protein                               |
| <i>SSA_1339</i> | Pneumococcal histidine triad protein D                                                       |

|                 |                                                                               |
|-----------------|-------------------------------------------------------------------------------|
|                 | precursor, putative                                                           |
| <i>SSA_1359</i> | Arginine/histidine ABC transporter,<br>permease component, putative           |
| <i>SSA_1363</i> | FmtA-like protein, putative                                                   |
| <i>SSA_1365</i> | FmtA-like protein, putative                                                   |
| <i>SSA_1368</i> | hypothetical protein SSA_1368                                                 |
| <i>SSA_1369</i> | FmtA-like protein, putative                                                   |
| <i>SSA_1371</i> | FmtA-like protein, putative                                                   |
| <i>SSA_1372</i> | hypothetical protein SSA_1372                                                 |
| <i>SSA_1390</i> | hypothetical protein SSA_1390                                                 |
| <i>SSA_1391</i> | hypothetical protein SSA_1391                                                 |
| <i>SSA_1408</i> | hypothetical protein SSA_1408                                                 |
| <i>SSA_1415</i> | Oxidoreductase, putative                                                      |
| <i>SSA_1434</i> | Conserved uncharacterized Firmicutes<br>protein                               |
| <i>SSA_1481</i> | FmtA-like protein, putative                                                   |
| <i>SSA_1489</i> | hypothetical protein SSA_1489                                                 |
| <i>SSA_1525</i> | Lysozyme M1 (1,4-beta-N-<br>acetylmuramidase), putative                       |
| <i>SSA_1532</i> | Membrane-fusion protein / periplasmic<br>component of efflux system, putative |
| <i>SSA_1544</i> | Conserved uncharacterized protein                                             |
| <i>SSA_1567</i> | Polar amino acid ABC transporter, amino<br>acid-binding protein, putative     |
| <i>SSA_1588</i> | Conserved ABC-type antimicrobial<br>permease-like protein, putative           |
| <i>SSA_1591</i> | Dipeptidase, putative                                                         |
| <i>SSA_1593</i> | Dipeptidase, putative                                                         |
| <i>SSA_1594</i> | Metalloendopeptidase, putative                                                |
| <i>SSA_1596</i> | hypothetical protein SSA_1596                                                 |
| <i>SSA_1597</i> | hypothetical protein SSA_1597                                                 |
| <i>SSA_1598</i> | hypothetical protein SSA_1598                                                 |
| <i>SSA_1599</i> | hypothetical protein SSA_1599                                                 |
| <i>SSA_1626</i> | DNA translocase ftsK, putative                                                |
| <i>SSA_1631</i> | Sortase-like protein, putative                                                |
| <i>SSA_1632</i> | Surface protein, putative                                                     |
| <i>SSA_1633</i> | FimA fimbrial subunit-like protein, putative                                  |
| <i>SSA_1634</i> | Heme utilization/adhesion exoprotein,<br>putative                             |
| <i>SSA_1635</i> | hypothetical protein SSA_1635                                                 |
| <i>SSA_1649</i> | hypothetical protein SSA_1649                                                 |
| <i>SSA_1650</i> | 3-ketoacyl-(acyl-carrier-protein) reductase                                   |
| <i>SSA_1653</i> | hypothetical protein SSA_1653                                                 |
| <i>SSA_1663</i> | Collagen-binding protein A                                                    |

|                 |                                                                                       |
|-----------------|---------------------------------------------------------------------------------------|
| <i>SSA_1671</i> | hypothetical protein SSA_1671                                                         |
| <i>SSA_1673</i> | hypothetical protein SSA_1673                                                         |
| <i>SSA_1680</i> | ABC-type bacitracin resistance protein A,<br>permease component, putative             |
| <i>SSA_1692</i> | Phospho-B-galactosidase LacG, putative                                                |
| <i>SSA_1744</i> | Iron compound ABC transporter, permease<br>protein, putative                          |
| <i>SSA_1750</i> | Extracellular nuclease, putative                                                      |
| <i>SSA_1793</i> | Histidine kinase (sensor protein), putative                                           |
| <i>SSA_1871</i> | Penicillin-binding protein 2X, putative                                               |
| <i>SSA_1882</i> | Subtilisin-like serine proteases, putative                                            |
| <i>SSA_1909</i> | Transcriptional attenuator LytR, putative                                             |
| <i>SSA_1951</i> | Penicillin-binding protein 3, putative                                                |
| <i>SSA_1960</i> | hypothetical protein SSA_1960                                                         |
| <i>SSA_1961</i> | Amino acid ABC transporter, amino acid-<br>binding protein/permease protein, putative |
| <i>SSA_1984</i> | Cell surface SD repeat antigen precursor,<br>putative                                 |
| <i>SSA_1985</i> | hypothetical protein SSA_1985                                                         |
| <i>SSA_1991</i> | Pneumococcal histidine triad protein A,<br>putative                                   |
| <i>SSA_2004</i> | Zinc metalloprotease zmpB precursor,<br>putative                                      |
| <i>SSA_2014</i> | D-alanyl-D-alanine carboxypeptidase,<br>putative                                      |
| <i>SSA_2020</i> | hypothetical protein SSA_2020                                                         |
| <i>SSA_2023</i> | Fructan beta-fructosidase precursor, putative                                         |
| <i>SSA_2056</i> | Cinnamoyl ester hydrolase, putative                                                   |
| <i>SSA_2060</i> | Arabinose efflux permease, putative                                                   |
| <i>SSA_2074</i> | preprotein translocase subunit YajC                                                   |
| <i>SSA_2101</i> | Amino acid ABC transporter, periplasmic<br>amino acid-binding protein, putative       |
| <i>SSA_2103</i> | hypothetical protein SSA_2103                                                         |
| <i>SSA_2121</i> | Cell wall surface anchor family protein,<br>putative                                  |
| <i>SSA_2169</i> | Glucose-1-phosphate uridylyltransferase,<br>putative                                  |
| <i>SSA_2248</i> | hypothetical protein SSA_2248                                                         |
| <i>SSA_2250</i> | ABC-type antimicrobial peptide transporter,<br>permease component, putative           |
| <i>SSA_2264</i> | hypothetical protein SSA_2264                                                         |
| <i>SSA_2269</i> | hypothetical protein SSA_2269                                                         |
| <i>SSA_2281</i> | hypothetical protein SSA_2281                                                         |
| <i>SSA_2282</i> | Phage infection protein, putative                                                     |

|                 |                                                                            |
|-----------------|----------------------------------------------------------------------------|
| <i>SSA_2301</i> | S-layer protein/ peptidoglycan endo-beta-N-acetylglucosaminidase, putative |
| <i>SSA_2307</i> | hypothetical protein SSA_2307                                              |
| <i>SSA_2313</i> | hypothetical protein SSA_2313                                              |
| <i>SSA_2320</i> | hypothetical protein SSA_2320                                              |
| <i>SSA_2321</i> | Cation (Co/Zn/Cd) efflux protein, putative                                 |
| <i>SSA_2338</i> | Conserved uncharacterized protein                                          |
| <i>SSA_2340</i> | hypothetical protein SSA_2340                                              |
| <i>SSA_2364</i> | Immunodominant staphylococcal antigen A precursor, putative                |
| <i>SSA_2381</i> | DegP protein, putative                                                     |

---

S2 table. Microtitter plate readings for wild type and mutant strains before (upper table) and after (lower table) crystal violet staining.

|          | <b>WT</b> | <b>Δ0849</b> | <b>Δ0351</b> | <b>Δ0291</b> | <b>Δ0371</b> | <b>Δ1948</b> | <b>Δ1950</b> | <b>Δ2141</b> | <b>Δ2142</b> |
|----------|-----------|--------------|--------------|--------------|--------------|--------------|--------------|--------------|--------------|
| read # 1 | 0.846     | 0.82         | 0.886        | 0.915        | 0.733        | 0.885        | 0.915        | 0.81         | 0.831        |
| read # 2 | 0.909     | 0.889        | 0.888        | 0.867        | 0.761        | 0.927        | 0.962        | 0.799        | 0.849        |
| read # 3 | 0.905     | 0.88         | 0.937        | 0.963        | 0.83         | 0.88         | 1.061        | 0.745        | 0.904        |
| read # 4 | 0.965     | 0.909        | 0.785        | 0.96         | 0.772        | 0.872        | 1            | 0.843        | 0.906        |
| read # 5 | 0.911     | 0.902        | 0.956        | 0.904        | 0.839        | 0.87         | 1.071        | 0.741        | 0.86         |
| read # 6 | 0.896     | 0.852        | 0.955        | 0.988        | 0.919        | 0.966        | 1.079        | 0.973        | 0.96         |
| read # 7 | 0.879     | 0.897        | 0.963        | 0.904        | 0.872        | 0.929        | 1.093        | 0.819        | 0.902        |
| read # 8 | 0.84      | 0.852        | 0.919        | 0.859        | 0.763        | 0.871        | 0.991        | 0.827        | 0.923        |
| average  | 0.893875  | 0.875125     | 0.911125     | 0.92         | 0.811125     | 0.9          | 1.0215       | 0.819625     | 0.891875     |
| P-value  |           | 0.31073      | 0.504805     | 0.247684     | 0.00793      | 0.751848     | 0.00029      | 0.023165     | 0.924001     |

|          | <b>WT</b> | <b>Δ0849</b> | <b>Δ0351</b> | <b>Δ0291</b> | <b>Δ0371</b> | <b>Δ1948</b> | <b>Δ1950</b> | <b>Δ2141</b> | <b>Δ2142</b> |
|----------|-----------|--------------|--------------|--------------|--------------|--------------|--------------|--------------|--------------|
| read # 1 | 1.028     | 2.168        | 0.132        | 0.107        | 0.105        | 0.126        | 0.11         | 0.109        | 0.166        |
| read # 2 | 1.46      | 1.99         | 0.091        | 0.101        | 0.103        | 0.105        | 0.095        | 0.101        | 0.095        |
| read # 3 | 1.55      | 1.982        | 0.097        | 0.107        | 0.118        | 0.107        | 0.102        | 0.107        | 0.108        |
| read # 4 | 1.303     | 2.169        | 0.104        | 0.103        | 0.118        | 0.107        | 0.113        | 0.083        | 0.113        |
| read # 5 | 1.776     | 2.108        | 0.106        | 0.098        | 0.105        | 0.115        | 0.089        | 0.098        | 0.111        |
| read # 6 | 1.755     | 1.821        | 0.105        | 0.093        | 0.104        | 0.103        | 0.102        | 0.096        | 0.111        |
| read # 7 | 1.463     | 1.85         | 0.098        | 0.095        | 0.103        | 0.113        | 0.09         | 0.109        | 0.102        |
| read # 8 | 1.327     | 1.622        | 0.106        | 0.108        | 0.141        | 0.124        | 0.136        | 0.119        | 0.123        |
| average  | 1.45775   | 1.96375      | 0.104875     | 0.1015       | 0.112125     | 0.1125       | 0.104625     | 0.10275      | 0.116125     |
| P-value  |           | 0.000418     | 3.21E-10     | 3.07E-10     | 3.46E-10     | 3.43E-10     | 3.23E-10     | 3.13E-10     | 3.72E-10     |
